# Supplementary material for: Air Quality, Pollution and Sustainability Trends in South Asia: A Population-Based Study
Source: MDPI journal article supplement (doi:10.3390/ijerph19127534), 2022-06-20
Supplement: s1 [file s1]

## Supplementary Materials

**Supplementary Table S1: Air Quality Data**

| Country   | Year | Carbon Dioxide | Total Greenhouse Gases | Methane | Nitrous Oxide |
|-----------|------|----------------|------------------------|---------|---------------|
| Sri Lanka | 1990 | 3.831          | 29.15                  | 18.41   | 2.25          |
| Sri Lanka | 1991 | 4.138          | 29.1                   | 18.24   | 2.22          |
| Sri Lanka | 1992 | 5.106          | 30.95                  | 18.72   | 2.33          |
| Sri Lanka | 1993 | 4.975          | 31.4                   | 19.18   | 2.47          |
| Sri Lanka | 1994 | 5.435          | 32.32                  | 19.29   | 2.59          |
| Sri Lanka | 1995 | 5.814          | 32.47                  | 19.48   | 2.5           |
| Sri Lanka | 1996 | 6.971          | 32.19                  | 16.73   | 2.41          |
| Sri Lanka | 1997 | 7.52           | 30.06                  | 14.6    | 2.41          |
| Sri Lanka | 1998 | 7.736          | 27.46                  | 11.75   | 2.38          |
| Sri Lanka | 1999 | 8.517          | 26.75                  | 9.98    | 2.53          |
| Sri Lanka | 2000 | 10.134         | 25.84                  | 7.71    | 2.45          |
| Sri Lanka | 2001 | 10.326         | 23.54                  | 7.61    | 2.44          |
| Sri Lanka | 2002 | 10.948         | 24.54                  | 7.84    | 2.67          |
| Sri Lanka | 2003 | 10.953         | 25.78                  | 8.23    | 2.47          |
| Sri Lanka | 2004 | 12.147         | 25.98                  | 7.89    | 2.54          |
| Sri Lanka | 2005 | 11.935         | 27.96                  | 8.56    | 2.72          |
| Sri Lanka | 2006 | 11.793         | 26.41                  | 8.61    | 2.68          |
| Sri Lanka | 2007 | 12.152         | 27.37                  | 8.46    | 2.59          |
| Sri Lanka | 2008 | 11.987         | 27.67                  | 9.16    | 2.95          |
| Sri Lanka | 2009 | 12.945         | 26.82                  | 8.98    | 2.78          |
| Sri Lanka | 2010 | 13.051         | 28.05                  | 9.45    | 2.73          |
| Sri Lanka | 2011 | 14.886         | 29.14                  | 9.64    | 3.01          |
| Sri Lanka | 2012 | 15.798         | 30.51                  | 9.76    | 2.78          |
| Sri Lanka | 2013 | 14.679         | 28.37                  | 10.09   | 2.59          |
| Sri Lanka | 2014 | 17.691         | 31.22                  | 9.22    | 3.11          |
| Sri Lanka | 2015 | 19.83          | 34.51                  | 9.65    | 3.14          |
| Sri Lanka | 2016 | 23.027         | 37.21                  | 9.9     | 2.52          |
| Sri Lanka | 2017 | 23.03          | 37.83                  | 9.11    | 2.35          |
| Sri Lanka | 2018 | 20.998         | 37.15                  | 10.03   | 2.24          |
| Sri Lanka | 2019 | 22.825         |                        |         |               |
| Sri Lanka | 2020 | 21.106         |                        |         |               |
| Pakistan  | 1990 | 67.827         | 166.5                  | 70.35   | 26.85         |

|            |      |         |        |        |       |
|------------|------|---------|--------|--------|-------|
| Pakistan   | 1991 | 67.477  | 167.45 | 71.67  | 27.2  |
| Pakistan   | 1992 | 72.015  | 176.65 | 72.64  | 28.79 |
| Pakistan   | 1993 | 77.176  | 186.47 | 74.85  | 29.55 |
| Pakistan   | 1994 | 84.018  | 193.14 | 76.11  | 32.43 |
| Pakistan   | 1995 | 83.614  | 203.61 | 77.77  | 34.74 |
| Pakistan   | 1996 | 93.539  | 210.65 | 81.42  | 34.88 |
| Pakistan   | 1997 | 93.788  | 217.56 | 83.56  | 36.01 |
| Pakistan   | 1998 | 96.741  | 221.37 | 85.89  | 36.5  |
| Pakistan   | 1999 | 99.389  | 233.94 | 88.41  | 37.81 |
| Pakistan   | 2000 | 105.42  | 236.06 | 89.83  | 38.73 |
| Pakistan   | 2001 | 107.126 | 238.3  | 91.1   | 39.13 |
| Pakistan   | 2002 | 112.904 | 244.71 | 93.78  | 40.27 |
| Pakistan   | 2003 | 117.491 | 252.54 | 97.04  | 41.38 |
| Pakistan   | 2004 | 129.96  | 269.49 | 99.59  | 42.68 |
| Pakistan   | 2005 | 134.757 | 277.77 | 102.46 | 44.97 |
| Pakistan   | 2006 | 143.726 | 297.16 | 109.3  | 46.47 |
| Pakistan   | 2007 | 155.846 | 313.94 | 112.12 | 46.43 |
| Pakistan   | 2008 | 155.356 | 316.9  | 116.86 | 48.51 |
| Pakistan   | 2009 | 155.221 | 327.27 | 119.81 | 52.73 |
| Pakistan   | 2010 | 154.145 | 321.54 | 119.25 | 51.84 |
| Pakistan   | 2011 | 154.66  | 328.63 | 125.32 | 52.79 |
| Pakistan   | 2012 | 153.876 | 332.43 | 127.77 | 51.37 |
| Pakistan   | 2013 | 150.451 | 342.88 | 132.76 | 54.81 |
| Pakistan   | 2014 | 156.243 | 356.49 | 136.69 | 55.27 |
| Pakistan   | 2015 | 169.252 | 371.24 | 139.81 | 56.3  |
| Pakistan   | 2016 | 207.019 | 396.4  | 143.28 | 57.87 |
| Pakistan   | 2017 | 233.978 | 421.6  | 147.54 | 60.08 |
| Pakistan   | 2018 | 238.306 | 438.22 | 151.02 | 60.95 |
| Pakistan   | 2019 | 234.289 |        |        |       |
| Pakistan   | 2020 | 234.755 |        |        |       |
| Bangladesh | 1990 | 14.082  | 115.06 | 64.43  | 16.46 |
| Bangladesh | 1991 | 14.742  | 115.24 | 64.51  | 17.25 |
| Bangladesh | 1992 | 15.38   | 117.14 | 65.1   | 17.55 |
| Bangladesh | 1993 | 16.063  | 118.35 | 65.18  | 17.93 |
| Bangladesh | 1994 | 17.538  | 120.8  | 65.99  | 18.58 |
| Bangladesh | 1995 | 21.042  | 125.86 | 66.72  | 19.86 |
| Bangladesh | 1996 | 21.493  | 126.39 | 66.41  | 20.39 |
| Bangladesh | 1997 | 23.126  | 128.66 | 66.99  | 19.91 |

|            |      |          |         |        |        |
|------------|------|----------|---------|--------|--------|
| Bangladesh | 1998 | 23.198   | 128.46  | 66.53  | 19.95  |
| Bangladesh | 1999 | 25.075   | 132.37  | 68.44  | 21.22  |
| Bangladesh | 2000 | 26.525   | 134.54  | 68.99  | 21.38  |
| Bangladesh | 2001 | 31.035   | 139.71  | 69.02  | 21.91  |
| Bangladesh | 2002 | 31.981   | 143.03  | 70.23  | 22.4   |
| Bangladesh | 2003 | 33.459   | 144.67  | 71.08  | 21.97  |
| Bangladesh | 2004 | 35.945   | 146.24  | 70.74  | 22.07  |
| Bangladesh | 2005 | 37.677   | 150.91  | 72.39  | 22.87  |
| Bangladesh | 2006 | 41.689   | 156.42  | 73.44  | 24.05  |
| Bangladesh | 2007 | 42.642   | 159.06  | 73.96  | 23.98  |
| Bangladesh | 2008 | 45.301   | 167.36  | 76.48  | 26.1   |
| Bangladesh | 2009 | 49.148   | 171.06  | 77.4   | 25.62  |
| Bangladesh | 2010 | 53.992   | 178.5   | 78.47  | 26.08  |
| Bangladesh | 2011 | 56.556   | 183.76  | 79.17  | 27.08  |
| Bangladesh | 2012 | 60.691   | 187.33  | 79.58  | 26.5   |
| Bangladesh | 2013 | 61.782   | 190.85  | 80.1   | 26.78  |
| Bangladesh | 2014 | 65.979   | 195.62  | 80.65  | 27.66  |
| Bangladesh | 2015 | 73.277   | 204.52  | 80.92  | 28.23  |
| Bangladesh | 2016 | 76.477   | 205.26  | 80.24  | 27.28  |
| Bangladesh | 2017 | 80.944   | 214.18  | 82.6   | 28.4   |
| Bangladesh | 2018 | 82.6     | 220.75  | 83.81  | 29.27  |
| Bangladesh | 2019 | 94.215   |         |        |        |
| Bangladesh | 2020 | 92.842   |         |        |        |
| India      | 1990 | 578.518  | 1009.44 | 524.84 | 141.64 |
| India      | 1991 | 615.925  | 1064.49 | 530.63 | 145.7  |
| India      | 1992 | 656.033  | 1096.71 | 535.41 | 149.88 |
| India      | 1993 | 677.916  | 1128.44 | 541.1  | 153.36 |
| India      | 1994 | 716.918  | 1174.78 | 545.99 | 158.98 |
| India      | 1995 | 762.121  | 1240.44 | 553.59 | 163.51 |
| India      | 1996 | 825.919  | 1289.63 | 561.99 | 167.85 |
| India      | 1997 | 859.686  | 1348.09 | 568.53 | 174.13 |
| India      | 1998 | 877.698  | 1382.26 | 578.38 | 179.26 |
| India      | 1999 | 951.749  | 1460.24 | 586.74 | 183.78 |
| India      | 2000 | 978.919  | 1498.2  | 590.33 | 181.23 |
| India      | 2001 | 992.56   | 1747.49 | 595.27 | 185.61 |
| India      | 2002 | 1023.027 | 1769.79 | 589.81 | 179.55 |
| India      | 2003 | 1059.616 | 1817.42 | 600.2  | 188.25 |
| India      | 2004 | 1125.471 | 1905.13 | 609.1  | 195.6  |

|        |      |          |         |        |        |
|--------|------|----------|---------|--------|--------|
| India  | 2005 | 1185.953 | 1977.76 | 622.72 | 203.88 |
| India  | 2006 | 1259.744 | 2073.67 | 632.14 | 213.25 |
| India  | 2007 | 1358.152 | 2219.62 | 645.57 | 223.31 |
| India  | 2008 | 1462.815 | 2317.48 | 651.97 | 226.38 |
| India  | 2009 | 1612.817 | 2467.78 | 648.99 | 234.38 |
| India  | 2010 | 1677.888 | 2576.93 | 653.89 | 241.24 |
| India  | 2011 | 1780.13  | 2610.32 | 655.48 | 246.58 |
| India  | 2012 | 1963.586 | 2758.53 | 654.89 | 246.83 |
| India  | 2013 | 2036.937 | 2816.49 | 656.08 | 244.59 |
| India  | 2014 | 2185.856 | 2988.34 | 655.78 | 245.91 |
| India  | 2015 | 2268.567 | 3002.17 | 653.61 | 247.78 |
| India  | 2016 | 2382.223 | 3073.24 | 659.81 | 247.44 |
| India  | 2017 | 2433.856 | 3202.82 | 665.04 | 252.04 |
| India  | 2018 | 2599.806 | 3346.63 | 669.34 | 256.88 |
| India  | 2019 | 2625.968 |         |        |        |
| India  | 2020 | 2441.792 |         |        |        |
| Bhutan | 1990 | 0.128    | -5.46   | 0.85   | 0.18   |
| Bhutan | 1991 | 0.175    | -5.41   | 0.85   | 0.17   |
| Bhutan | 1992 | 0.205    | -5.42   | 0.82   | 0.17   |
| Bhutan | 1993 | 0.172    | -5.45   | 0.82   | 0.17   |
| Bhutan | 1994 | 0.202    | -5.42   | 0.82   | 0.17   |
| Bhutan | 1995 | 0.236    | -5.32   | 0.87   | 0.18   |
| Bhutan | 1996 | 0.284    | -5.29   | 0.86   | 0.17   |
| Bhutan | 1997 | 0.375    | -5.2    | 0.87   | 0.18   |
| Bhutan | 1998 | 0.368    | -5.19   | 0.88   | 0.18   |
| Bhutan | 1999 | 0.372    | -5.13   | 0.92   | 0.19   |
| Bhutan | 2000 | 0.383    | -5.18   | 0.88   | 0.17   |
| Bhutan | 2001 | 0.369    | -5.24   | 0.83   | 0.17   |
| Bhutan | 2002 | 0.401    | -5.21   | 0.83   | 0.17   |
| Bhutan | 2003 | 0.36     | -5.25   | 0.83   | 0.17   |
| Bhutan | 2004 | 0.291    | -5.28   | 0.84   | 0.18   |
| Bhutan | 2005 | 0.378    | -5.09   | 0.91   | 0.19   |
| Bhutan | 2006 | 0.374    | -5.11   | 0.91   | 0.19   |
| Bhutan | 2007 | 0.373    | -5.03   | 0.95   | 0.22   |
| Bhutan | 2008 | 0.401    | -5.16   | 0.86   | 0.18   |
| Bhutan | 2009 | 0.369    | -5.14   | 0.9    | 0.19   |
| Bhutan | 2010 | 0.465    | -4.99   | 0.93   | 0.21   |
| Bhutan | 2011 | 0.667    | 0.48    | 0.91   | 0.19   |

|        |      |        |       |       |      |
|--------|------|--------|-------|-------|------|
| Bhutan | 2012 | 0.773  | 0.62  | 0.94  | 0.22 |
| Bhutan | 2013 | 0.853  | 0.67  | 0.92  | 0.19 |
| Bhutan | 2014 | 0.948  | 0.74  | 0.9   | 0.2  |
| Bhutan | 2015 | 0.965  | 0.77  | 0.89  | 0.2  |
| Bhutan | 2016 | 1.156  | 1.01  | 0.88  | 0.19 |
| Bhutan | 2017 | 1.239  | 1.11  | 0.87  | 0.19 |
| Bhutan | 2018 | 1.436  | 1.16  | 0.86  | 0.19 |
| Bhutan | 2019 | 1.927  |       |       |      |
| Bhutan | 2020 | 1.925  |       |       |      |
| Nepal  | 1990 | 0.721  | 20.6  | 16.95 | 4.48 |
| Nepal  | 1991 | 1.026  | 20.99 | 17.04 | 4.54 |
| Nepal  | 1992 | 1.233  | 20.85 | 16.83 | 4.55 |
| Nepal  | 1993 | 1.397  | 21.8  | 17.52 | 4.64 |
| Nepal  | 1994 | 1.619  | 22.89 | 17.89 | 4.82 |
| Nepal  | 1995 | 2.309  | 24.1  | 18.8  | 5    |
| Nepal  | 1996 | 2.353  | 24.77 | 19.46 | 4.95 |
| Nepal  | 1997 | 2.641  | 25.68 | 20.03 | 5.06 |
| Nepal  | 1998 | 2.223  | 26.84 | 20.81 | 5.29 |
| Nepal  | 1999 | 3.191  | 28.75 | 21.59 | 5.34 |
| Nepal  | 2000 | 3.037  | 29.46 | 22.15 | 5.37 |
| Nepal  | 2001 | 3.236  | 27.11 | 22.27 | 5.5  |
| Nepal  | 2002 | 2.596  | 26.4  | 22.5  | 5.23 |
| Nepal  | 2003 | 2.81   | 27.65 | 23.21 | 5.54 |
| Nepal  | 2004 | 2.582  | 27.86 | 23.6  | 5.57 |
| Nepal  | 2005 | 2.987  | 28.68 | 24    | 5.63 |
| Nepal  | 2006 | 2.456  | 28.47 | 24.3  | 5.68 |
| Nepal  | 2007 | 2.57   | 28.8  | 24.48 | 5.75 |
| Nepal  | 2008 | 3.352  | 30.37 | 25.37 | 6.13 |
| Nepal  | 2009 | 4.129  | 32.45 | 26.09 | 6.61 |
| Nepal  | 2010 | 4.824  | 33.93 | 26.46 | 6.95 |
| Nepal  | 2011 | 5.22   | 42.54 | 27.2  | 7.09 |
| Nepal  | 2012 | 5.47   | 44.84 | 28.31 | 7.47 |
| Nepal  | 2013 | 6.218  | 45.78 | 28.83 | 7.81 |
| Nepal  | 2014 | 7.591  | 47.78 | 29.5  | 8.08 |
| Nepal  | 2015 | 6.817  | 46.82 | 29.49 | 7.8  |
| Nepal  | 2016 | 9.76   | 52.26 | 30.79 | 9.1  |
| Nepal  | 2017 | 11.648 | 53.06 | 30.77 | 8.24 |
| Nepal  | 2018 | 13.69  | 54.57 | 30.99 | 8.53 |

|       |      |        |  |  |  |
|-------|------|--------|--|--|--|
| Nepal | 2019 | 16.967 |  |  |  |
| Nepal | 2020 | 16.958 |  |  |  |

**Supplementary Table 2: Air Pollution Data**

| Series Name                                                            | Country  | 1990       | 2000       | 2012       | 2013       | 2014       | 2015       | 2016       | 2017       |
|------------------------------------------------------------------------|----------|------------|------------|------------|------------|------------|------------|------------|------------|
| PM2.5 air pollution, mean annual exposure (micrograms per cubic meter) | Pakistan | 60.334659  | 61.1060275 | 62.3766463 | 61.0221629 | 59.5183627 | 60.0858929 | 58.6327639 | 58.2824188 |
| PM2.5 air pollution, mean annual exposure                              | India    | 81.2906306 | 84.1648062 | 88.1694406 | 91.8047916 | 89.6223827 | 89.3033343 | 89.6721769 | 90.8732105 |

|                                                                        |            |            |            |            |            |            |            |            |            |
|------------------------------------------------------------------------|------------|------------|------------|------------|------------|------------|------------|------------|------------|
| (micrograms per cubic meter)                                           |            |            |            |            |            |            |            |            |            |
| PM2.5 air pollution, mean annual exposure (micrograms per cubic meter) | Bangladesh | 61.5956296 | 63.0363418 | 70.7939088 | 65.6450829 | 68.3953774 | 66.9657492 | 60.1262747 | 60.8457846 |
| PM2.5 air pollution, mean annual exposure (micrograms per cubic meter) | Bhutan     | 40.2059691 | 39.7495788 | 42.9322729 | 41.881907  | 40.8396737 | 39.8186387 | 37.2243639 | 37.9265032 |

|                                                                                                               |              |                |                |                |                |                |                |                |                |
|---------------------------------------------------------------------------------------------------------------|--------------|----------------|----------------|----------------|----------------|----------------|----------------|----------------|----------------|
| PM2.5<br>air<br>polluti<br>on,<br>mean<br>annual<br>exposu<br>re<br>(microg<br>rams<br>per<br>cubic<br>meter) | Nepal        | 87.598<br>4548 | 88.943<br>0217 | 96.963<br>2915 | 95.313<br>9856 | 98.116<br>0166 | 96.252<br>7682 | 98.054<br>714  | 99.734<br>3737 |
| PM2.5<br>air<br>polluti<br>on,<br>mean<br>annual<br>exposu<br>re<br>(microg<br>rams<br>per<br>cubic<br>meter) | Sri<br>Lanka | 29.768<br>5035 | 30.855<br>7618 | 30.083<br>9728 | 28.898<br>2277 | 26.922<br>7765 | 25.337<br>3437 | 14.025<br>4452 | 11.099<br>6172 |



**Supplementary Table 3: Sustainability Trends Data**

|                | <b>People<br/>using<br/>safely<br/>managed<br/>drinking<br/>water<br/>services</b> | <b>People<br/>using<br/>safely<br/>managed<br/>sanitation<br/>services</b> | <b>Access to<br/>electricity</b> | <b>Renewable<br/>energy<br/>consumption</b>        | <b>Nationally<br/>protected<br/>terrestrial<br/>and<br/>marine<br/>areas</b> |
|----------------|------------------------------------------------------------------------------------|----------------------------------------------------------------------------|----------------------------------|----------------------------------------------------|------------------------------------------------------------------------------|
|                | <b>% of<br/>population</b>                                                         | <b>% of<br/>population</b>                                                 | <b>% of<br/>population</b>       | <b>% of total<br/>final energy<br/>consumption</b> | <b>% of total<br/>territorial<br/>area</b>                                   |
|                | <b>2020</b>                                                                        | <b>2020</b>                                                                | <b>2017</b>                      | <b>2015</b>                                        | <b>2018</b>                                                                  |
| Bangladesh     | 58.5                                                                               | 38.7                                                                       | 88                               | 34.2                                               | 4.9                                                                          |
| Bhutan         | 36.6                                                                               | 65.2                                                                       | 97.7                             | 86.7                                               | 48                                                                           |
| India          | NR                                                                                 | 45.9                                                                       | 92.5                             | 34.4                                               | 3.5                                                                          |
| Nepal          | 17.6                                                                               | 48.6                                                                       | 89.9                             | 85                                                 | 23.6                                                                         |
| Pakistan       | 35.8                                                                               | NR                                                                         | 70.8                             | 45.9                                               | 9.8                                                                          |
| Sri Lanka      | NR                                                                                 | NR                                                                         | 97.5                             | 52.9                                               | 3.4                                                                          |
| High<br>income | 97.7                                                                               | 87                                                                         | 100                              | 11.4                                               | 19.1                                                                         |
